# Supplementary material
Source: publisher figshare collection journal article supplement (https://diabetesjournals.figshare.com/ndownloader/files/26192600)

## Supplement

### Creating Composite Indices from Continuous Variables to Advance Diabetes-related Research: the Geometric Mean

#### Contents

|                                                                                                | Page Number |
|------------------------------------------------------------------------------------------------|-------------|
| <b>Table S1:</b> Potential Composite Indices Constructed from Continuous Variables             | 2           |
| <b>Table S2:</b> Individual Components of Each Composite Index                                 | 3           |
| <b>Table S3:</b> Summary Statistics for the Composite Z-score and Geometric Mean of Each Index | 4           |
| <b>Figure S1:</b> Formulae for the Arithmetic and Geometric Mean                               | 5           |
| <b>Figure S2:</b> Quantile-Quantile Plots                                                      | 5           |

| <b>Table S1: Potential Composite Indices Constructed from Continuous Variables</b> |                                                              |                                                                                                            |
|------------------------------------------------------------------------------------|--------------------------------------------------------------|------------------------------------------------------------------------------------------------------------|
| <b>Construct</b>                                                                   | <b>Nature of Components</b>                                  | <b>Examples of Components</b>                                                                              |
| <b>Glycemia</b>                                                                    | Measures of poor glycemic control                            | HbA1c, fructosamine, fasting glucose, inverse of time-in-target from CGM, inverse of CV from CGM           |
| <b>Renal disease</b>                                                               | Measures of renal disease                                    | Albumin to creatinine ratio, cystatin, inverse of eGFR                                                     |
| <b>Cognitive health</b>                                                            | Cognitive tests where higher score signifies better function | DSST, MOCA, MMSE                                                                                           |
| <b>Heart Disease</b>                                                               | Biomarkers positively linked to heart disease                | LDL, apoprotein B, systolic blood pressure, diastolic blood pressure, inverse of eGFR, troponin, NT-proBNP |
| <b>Infection</b>                                                                   | Body's response to infection or inflammation                 | Heart rate, temperature, white cell count, respiratory rate                                                |

Variables that are inversely correlated with the construct can be included by using the calculated reciprocal value of the variable; CGM – continuous glucose monitoring; CV – coefficient of variation; BMI – body mass index

| Table S2: Individual Components of Each Composite Index |       |                    |                                         |                   |
|---------------------------------------------------------|-------|--------------------|-----------------------------------------|-------------------|
| Index                                                   | N     | Component Variable | Mean (SD) of Ln<br>(Component Variable) | Mean (SD) Z-Score |
| <b>Glycemia</b>                                         | 12345 | FPG                | 1.96 (0.25)                             | 0.00 (1.00)       |
|                                                         | 12345 | HbA1c              | 1.86 (0.15)                             | 0.00 (1.00)       |
| <b>Renal</b>                                            | 12187 | 1/eGFR             | -4.31 (0.27)                            | 0.00 (1.00)       |
|                                                         | 12187 | ACR                | -0.08 (1.66)                            | 0.00 (1.00)       |
| <b>Cognitive</b>                                        | 3676  | MMSE               | 3.30 (0.13)                             | 0.00 (1.00)       |
|                                                         | 3676  | DSST               | 3.46 (0.57)                             | 0.00 (1.00)       |

ACR – albumin-to-creatinine ratio; eGFR – estimated glomerular filtration rate; MMSE –Mini Mental State Exam; DSST – Digit Symbol Substitution Test; FPG – Fasting plasma glucose; HbA1c – hemoglobin A1c

| Table S3: Summary Statistics for the Composite Z-score and Geometric Mean of Each Index |              |                                |                     |                             |                   |
|-----------------------------------------------------------------------------------------|--------------|--------------------------------|---------------------|-----------------------------|-------------------|
| Index                                                                                   | Components   | Composite Z-score <sup>a</sup> |                     | Geometric Mean <sup>b</sup> |                   |
|                                                                                         |              | Mean (SD)                      | Median (IQR)        | Mean (SD)                   | Median (IQR)      |
| <b>Glycemia</b>                                                                         | FPG & HbA1c  | 0.00 (0.86)                    | -0.07 (-0.61, 0.57) | 1.91 (0.17)                 | 1.89 (1.79, 2.02) |
| <b>Renal</b>                                                                            | ACR & 1/eGFR | 0.00 (0.75)                    | -0.11 (-0.52, 0.40) | 4.18 (0.56)                 | 4.06 (3.77, 4.47) |
| <b>Cognitive</b>                                                                        | MMSE & DSST  | 0.00 (0.82)                    | 0.17 (-0.37, 0.56)  | 3.37 (0.33)                 | 3.43 (3.22, 3.59) |

<sup>a</sup>Arithmetic mean of each person's 2 component Ln-transformed Z-scores; <sup>b</sup>Geometric mean of each person's 2 component Ln-transformed scores; ACR – albumin-to-creatinine ratio; eGFR – estimated glomerular filtration rate; MMSE –Mini Mental State Exam; DSST – Digit Symbol Substitution Test; FPG – Fasting plasma glucose; HbA1c – hemoglobin A1c

**Figure S1: Formulae for calculating the arithmetic and geometric mean**

$$\begin{aligned} \text{Geometric Mean } (a, b) &= (a * b)^{1/2} \\ \text{Geometric Mean } (a, b, c, d) &= (a * b * c * d)^{1/4} \\ \text{Arithmetic Mean } (a, b) &= (a + b)/2 \\ \text{Arithmetic Mean } (a, b, c, d) &= (a + b + c + d)/4 \end{aligned}$$

**Figure S2: Quantile-Quantile (Q-Q) plots of composite indices reflecting cognitive status (Panel A), renal status (Panel B), and glycemia (Panel C). For each panel, the y-axis is the quantile of the arithmetic mean of the 2 component standardized score, and the x-axis is the geometric mean of the 2 components.**

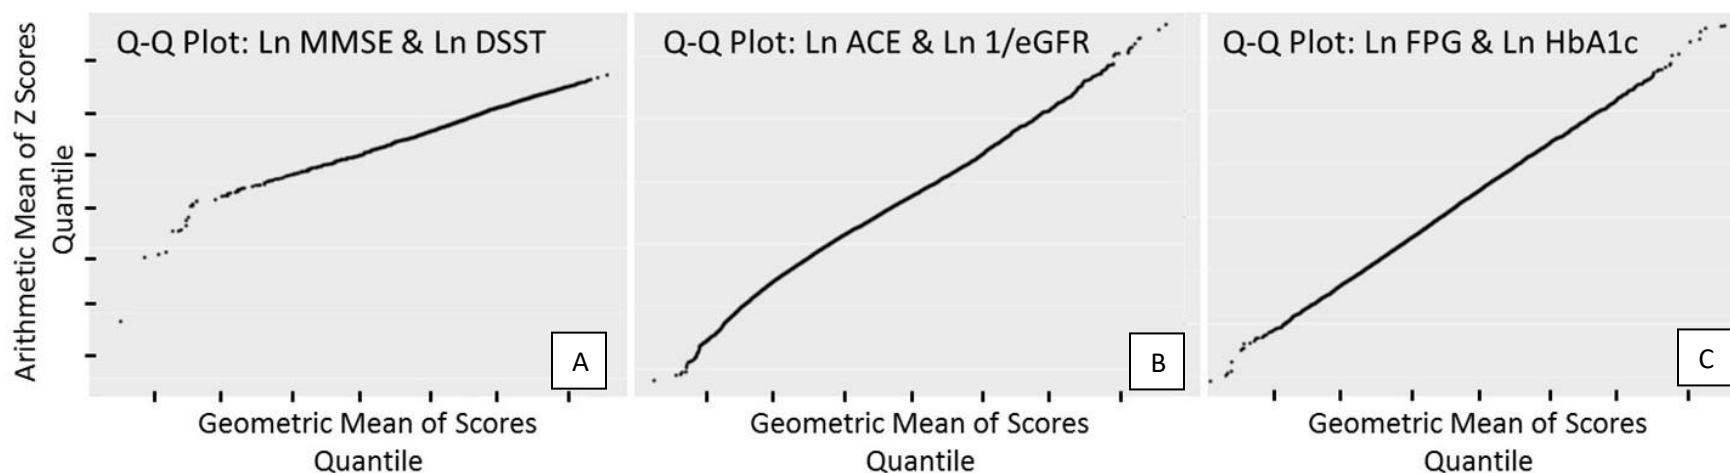

Supplement: Supplementary file 1 [file 26192600]
